# Supplementary material
Source: PubMed Central journal article supplement (PMC3125152)
Supplement: NIHMS300435-supplement-01.pdf [file NIHMS300435-supplement-01.pdf]

## Supplementary Text

### List of Supplementary Data Files

**File 1:** All of the designs identified in the OptKnock analysis.

**Supplementary Figure 1:** The strain designs generated for five different targets from glucose, xylose, and glycerol aerobically

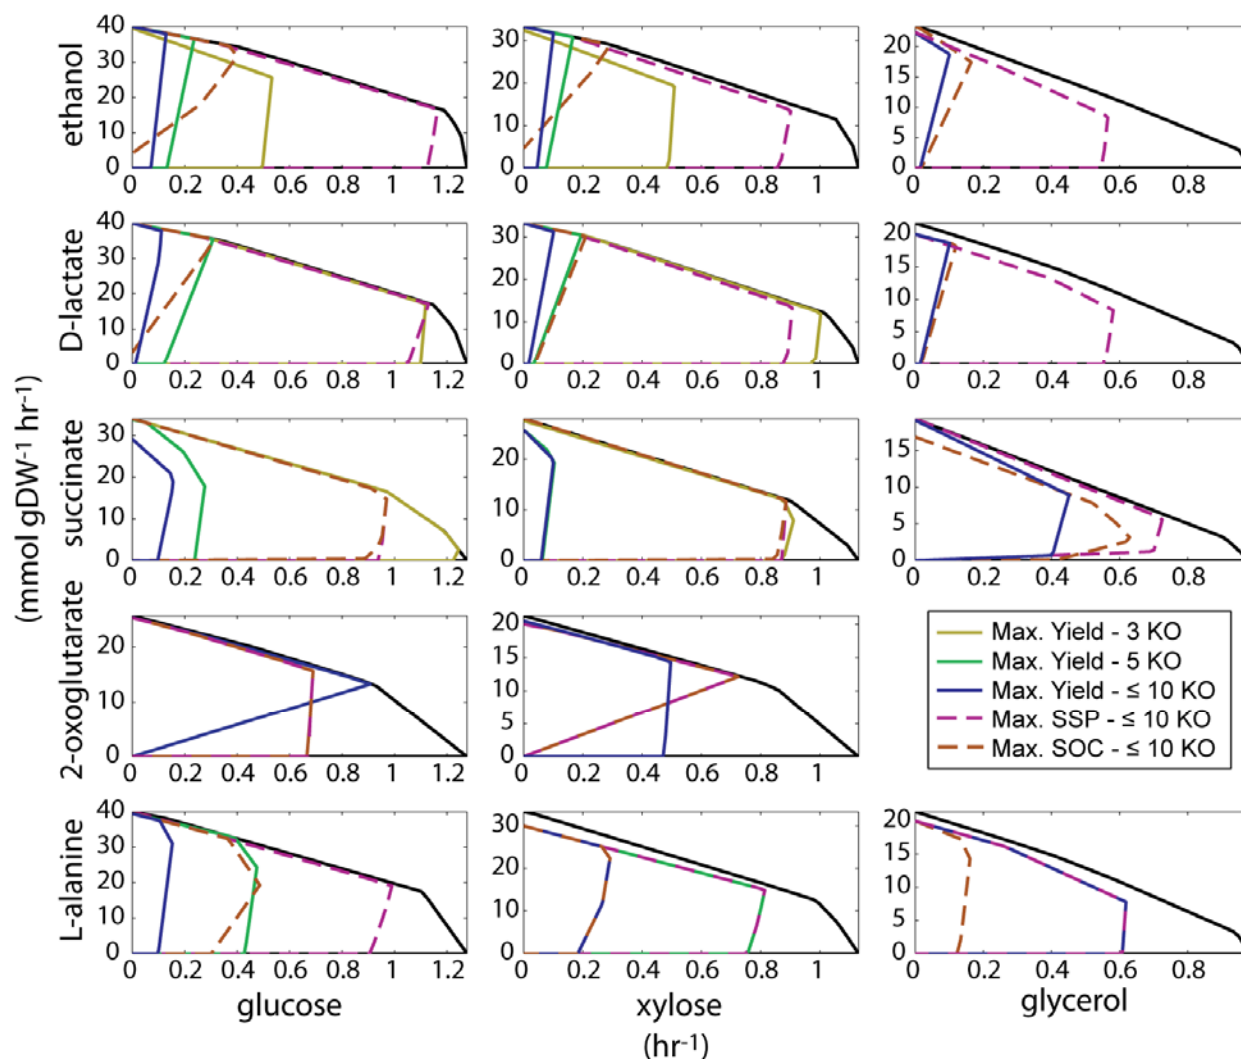

Supplementary Figure 1: A set of graphs that give the production envelopes for different substrate / target pairs that were calculated during the analysis under anaerobic conditions. The different target production rates (mmol gDW<sup>-1</sup> hr<sup>-1</sup>) are shown on the y-axis and the growth rate (hr<sup>-1</sup>) is given on the x-axis. Shown on each plot (if a solution exists) are the maximum yields for 3 knockouts (yellow, solid line), 5 knockouts (green, solid line), up to 10 knockouts (with a 99.99% deletion penalty, blue, solid line), the maximum substrate-specific productivity (SSP, pink, dashed line), and the maximum strength of growth coupling (SOC, orange, dashed line) design. For example, there are no valid solutions for 2-oxoglutarate production on glycerol given the minimum growth rate of 0.1 hr<sup>-1</sup>. Some of the solutions are identical for multiple objectives.

**Supplementary Figure 2:** Theoretical maximum production achievable for different substrate / target pairs for under aerobic conditions

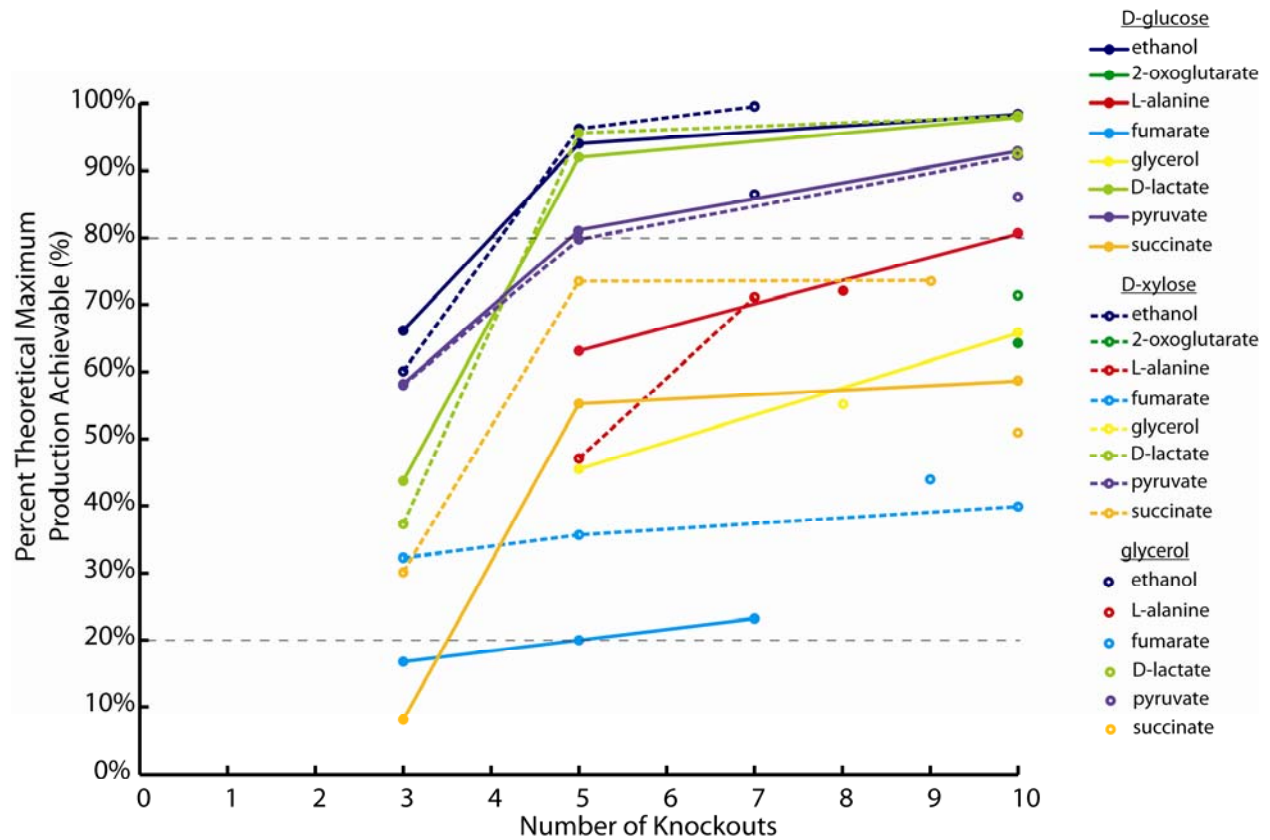

**Supplementary Table 1:** Changes from iAF1260 to make iAF1260b

| Reaction added (abbreviation) | Reason for addition                   |
|-------------------------------|---------------------------------------|
| DHORTfum                      | Added to no longer make FRD essential |
| MALt3pp                       | Means of excretion                    |
| ALAt2rpp                      | Means of excretion                    |
| GLYt2rpp                      | Means of excretion                    |
| CITt3pp                       | Means of excretion                    |
| ASPt2rpp                      | Means of excretion                    |
|                               |                                       |

**Supplemental Table 2: Theoretical Yields - Molar Yields**

|                | <i>Substrate</i>  | Glucose     | Xylose      | Glycerol    | Glucose     | Xylose      | Glycerol    |
|----------------|-------------------|-------------|-------------|-------------|-------------|-------------|-------------|
|                | <i>Aerobicity</i> | Anaerobic   | Anaerobic   | Anaerobic   | Aerobic     | Aerobic     | Aerobic     |
| product        | no. of carbons    | molar yield |
| Ethanol        | 2                 | 193%        | 159%        | 98%         | 193%        | 159%        | 108%        |
| D-Lactate      | 3                 | 193%        | 159%        | 13%         | 193%        | 159%        | 101%        |
| Glycerol       | 3                 | 73%         | 45%         |             | 148%        | 121%        |             |
| L-Alanine      | 3                 | 193%        | 127%        | 13%         | 193%        | 157%        | 99%         |
| L-Serine       | 3                 | 81%         | 50%         | 5%          | 198%        | 163%        | 102%        |
| Pyruvate       | 3                 | 147%        | 104%        | 7%          | 208%        | 171%        | 106%        |
| Fumarate       | 4                 | 86%         | 52%         | 4%          | 174%        | 142%        | 94%         |
| L-Malate       | 4                 | 86%         | 52%         | 4%          | 174%        | 142%        | 94%         |
| Succinate      | 4                 | 144%        | 105%        | 10%         | 161%        | 131%        | 88%         |
| 2-Oxoglutarate | 5                 | 50%         | 34%         | 2%          | 122%        | 100%        | 64%         |
| L-Glutamate    | 5                 | 55%         | 37%         | 2%          | 113%        | 93%         | 61%         |

**Supplementary Table 3: Substrate conditions**

| <b>Carbon Substrate(s)</b> | <b>Aerobicity</b> | <b>Wild Type Growth Rate</b> | <b>Target Reactions After Reduction of Scope</b> |
|----------------------------|-------------------|------------------------------|--------------------------------------------------|
| Glucose                    | Anaerobic         | 0.4589                       | 142                                              |
| Xylose                     | Anaerobic         | 0.3194                       | 141                                              |
| Glycerol                   | Anaerobic         | 0.1192                       | 140                                              |
| Glucose                    | Aerobic           | 1.2759                       | 170                                              |
| Xylose                     | Aerobic           | 1.1305                       | 165                                              |
| Glycerol                   | Aerobic           | 0.9828                       | 166                                              |
| Glucose / Acetate          | Anaerobic         | 0.4589                       | 142                                              |
| Glucose / Acetate          | Aerobic           | 1.2759                       | 170                                              |
| Glucose / AAs              | Anaerobic         | 1.0313                       | 162                                              |
| Glucose / AAs              | Aerobic           | 2.0996                       | 189                                              |

Maximum uptake rates for primary carbon sources and acetate were set to 20 mmol/gDW<sup>-1</sup> hr<sup>-1</sup>. Maximum amino acid (AA) uptake rates were set to 5 mmol/gDW<sup>-1</sup> hr<sup>-1</sup>. In aerobic simulations, maximum oxygen uptake rate was set to 20 mmol/gDW<sup>-1</sup> hr<sup>-1</sup>.

## Methods

### Description of OptGene procedure

OptGene was implemented as previously described [ref], with the following modifications, i) the genotype of the population was changed from genes to reactions. This was done to reduce the number of total targets needed as the number of gene associated with the set of target reactions was larger than the number of reactions (effectively decreasing search time) and to make optGene input have the same format as optKnock, ii.) the mutation function was modified as described below, iii. ) some parameters were modified as described below, this was performed in a conservative fashion to increase the chance of finding an optimal solution, and iv) solutions from OptKnock which had a positive production were used as an initial population for OptGene simulation, in order to increase the efficiency of the algorithm by inputting reasonably good initial guesses for further refinement. OptGene was implemented in the Matlab software framework using the Genetic Algorithms and Directed Search toolbox.

#### Specific Change: *Mutation Function*

It was noted that having an independent mutation function where at each generation, each reaction is toggled independently with probability  $1/nrxns$  will tend to increase the number of mutations until half the reactions are knocked out. As this is undesirable, a small modification was added where with 50% knockouts would be randomly removed until the child genome has fewer KO's than the parent. This heuristic makes the probability of increasing the number of KOs roughly equal to the probability of removing one.

#### Specific Change: *Hashing of genotypes*

A speed improvement made was the hashing of previously explored genotypes. All genotypes for which a fitness has been computed are put into a hash table (the key being a concatenation of the genotype). When a new genotype needs to be evaluated, the hash table is queried first to see if it has been previously computed. This results in a significant speedup in performance without affecting the results of the algorithm. The hashtable is periodically purged to prevent memory overflow. Note that this improvement has no effect on the outcome of the algorithm, only the speed.

**Supplementary Table 4: Parameters and values**

| Name                         | Value            | Value in [ref] | Description                                                                                                                                                                                                                      | Comments                                                                                                                                                                                               |
|------------------------------|------------------|----------------|----------------------------------------------------------------------------------------------------------------------------------------------------------------------------------------------------------------------------------|--------------------------------------------------------------------------------------------------------------------------------------------------------------------------------------------------------|
| <b>Simulation Parameters</b> |                  |                |                                                                                                                                                                                                                                  |                                                                                                                                                                                                        |
| Population size              | 4x125            | 125            | Multiple populations were used. The total number of individuals was increased by a factor of 4                                                                                                                                   | Increasing the number of individuals increases the chance of finding the optimum.                                                                                                                      |
| MigrationDirection           | Forward          | n/a            | Migration occurs between sub-populations. Individuals only move forward from one population to the next                                                                                                                          |                                                                                                                                                                                                        |
| MigrationFraction            | .1               | n/a            | The probability that any individual migrates to the next population at a migration event.                                                                                                                                        | 1/10 <sup>th</sup> of the population migrates.                                                                                                                                                         |
| MigrationInterval            | 100              | n/a            | How often migration intervals occur. In this case                                                                                                                                                                                | 100 is sufficiently high that for the most part the sub-populations are independent                                                                                                                    |
| MaxKO                        | 10               | varries        | Maximum number of KO's allowed.                                                                                                                                                                                                  |                                                                                                                                                                                                        |
| Mutation rate                | 1/nrxns*         | 1/nrxns        | The mutation rate indicates the probability that a child will have a different genome as its parent. The value 1/nrxns indicates that on average there will be one mutation per offspring (although there could be zero or more) | This was modified slightly to not accumulate mutations (see below). We looked at the distribution of mutations in the population and with this change there are more individuals with fewer mutations. |
| Cross over fraction          | .8               | 1              | This value represents the fraction of offspring which are produced by crossing over between two parents (as opposed to mutations from a single parent)                                                                           | 20% of individuals are now generated by a simple mutation process.                                                                                                                                     |
| Cross over mutation rate     | .2*mutation rate | 1/nrxns        | After crossing over, there is an additional probability of a mutation.                                                                                                                                                           |                                                                                                                                                                                                        |

|                               |          |                               |                                                                                                                                                         |                                                  |
|-------------------------------|----------|-------------------------------|---------------------------------------------------------------------------------------------------------------------------------------------------------|--------------------------------------------------|
| Cross over strategy           | uniform  | uniform or 1 point or 2 point | Crossovers are performed on a gene by gene basis. The offspring of two parents has an equal probability of receiving any given gene from either parent. |                                                  |
| Selection strategy            | roulette | roulette                      | Selection for the next generation is based on an individual's fitness. Greater fitness gives a higher probability.                                      |                                                  |
| Elite count                   | 2        | n/a                           | Number of top performing genotypes which automatically to pass to the next generation.                                                                  | This is to keep track of the global best scores. |
| <b>Terminating Conditions</b> |          |                               |                                                                                                                                                         |                                                  |
| MaxGenerations                | 10000    | 5000                          | The maximum number of generations performed.                                                                                                            |                                                  |
| StallGenLimit                 | 10000    | n/a                           | The maximum number of generations between finding an improved score.                                                                                    |                                                  |
| Time Limit                    | 2 days   | n/a                           | The maximum time limit                                                                                                                                  | This limit is not reached.                       |
| StallTimeLimit                | 1 day    | n/a                           | The maximum time between finding a score improvement                                                                                                    | This limit is not reached.                       |
